# Supplementary material for: External validity of randomized controlled trials in older adults, a systematic review
Source: PLoS One. 2017 Mar 27;12(3):e0174053. doi: 10.1371/journal.pone.0174053 (PMC5367677; doi:10.1371/journal.pone.0174053)
Supplement: S1 Appendix — (XLSX) [file pone.0174053.s002.xlsx]

## Sheet: Sheet1
PubMed UID	Title	Authors	Journal
22567095	Efficacy of memantine for agitation in Alzheimer's dementia: a randomised double-blind placebo controlled trial.	Fox C, Crugel M, Maidment I, Auestad BH, Coulton S, Treloar A, Ballard C, Boustani M, Katona C, Livingston G.	PLoS One
22953994	Does improved functional performance help to reduce urinary incontinence in institutionalized older women? A multicenter randomized clinical trial.	Tak EC, van Hespen A, van Dommelen P, Hopman-Rock M.	BMC Geriatr
22057579	Immunomodulatory effect of NSAID in geriatric patients with acute infection: effects of piro-icam on chemokine/cytokine secretion patterns and levels of heat shock proteins. A double-blind randomized controlled trial. (ISRCTN58517443).	Beyer I, Njemini R, Bautmans I, Demanet C, Mets T.	Cell Stress Chaperones
21450214	An open-label, randomized, multicenter, controlled study of epoetin alfa for the treatment of anemia of chronic kidney disease in the long term care setting.	Patel M, Thimons DG, Winston JL, Langholff W, McGowan T.	J Am Med Dir Assoc
23046564	Comparison between the AA/EPA ratio in depressed and non depressed elderly females: omega-3 fatty acid supplementation correlates with improved symptoms but does not change immunological parameters.	Rizzo AM, Corsetto PA, Montorfano G, Opizzi A, Faliva M, Giacosa A, Ricevuti G, Pelucchi C, Berra B, Rondanelli M.	Nutr J
22872695	Integration of balance and strength training into daily life activity to reduce rate of falls in older people (the LiFE study): randomised parallel trial.	Clemson L, Fiatarone Singh MA, Bundy A, Cumming RG, Manollaras K, O'Loughlin P, Black D.	BMJ
22443478	Transcatheter aortic-valve replacement for inoperable severe aortic stenosis.	Makkar RR, Fontana GP, Jilaihawi H, Kapadia S, Pichard AD, Douglas PS, Thourani VH, Babaliaros VC, Webb JG, Herrmann HC, Bavaria JE, Kodali S, Brown DL, Bowers B, Dewey TM, Svensson LG, Tuzcu M, Moses JW, Williams MR, Siegel RJ, Akin JJ, Anderson WN, et al.	N Engl J Med
22826621	Inhibitory effects of carbon dio-ide insufflation on pneumoperitoneum and bowel distension after percutaneous endoscopic gastrostomy.	Nishiwaki S, Araki H, Hayashi M, Takada J, Iwashita M, Tagami A, Hatakeyama H, Hayashi T, Maeda T, Saito K.	World J Gastroenterol
22995877	Early aggressive versus initially conservative treatment in elderly patients with non-ST-segment elevation acute coronary syndrome: a randomized controlled trial.	Savonitto S, Cavallini C, Petronio AS, Murena E, Antonicelli R, Sacco A, Steffenino G, Bonechi F, Mossuti E, Manari A, Tolaro S, Toso A, Daniotti A, Piscione F, Morici N, Cesana BM, Jori MC, De Servi S; Italian Elderly ACS Trial Investigators.	JACC Cardiovasc Interv
22324058	Whole-body vibration in addition to strength and balance e-ercise for falls-related functional mobility of frail older adults: a single-blind randomized controlled trial.	Pollock RD, Martin FC, Newham DJ.	Clin Rehabil
22587862	Effect of a mobile safety alarm on going outside, feeling safe, fear of falling, and quality of life in community-living older persons: a randomized controlled trial.	Scheffer AC, Scholte op Reimer WJ, van Dijk N, van Munster BC, Abu-Hanna A, Levi M, de Rooij SE.	J Am Geriatr Soc
21979272	Effectiveness of a targeted e-ercise intervention in reversing older people's mild balance dysfunction: a randomized controlled trial.	Yang -J, Hill K, Moore K, Williams S, Dowson L, Borschmann K, Simpson JA, Dharmage SC.	Phys Ther
23368904	Usefulness of a continuous suction mouthpiece during percutaneous endoscopic gastrostomy: A single-center, prospective, randomized study.	Maekita T, Kato J, Nakatani Y, Enomoto S, Kayama T, Tsuji M, Nakaya T, Muraki Y, Deguchi H, Ueda K, Inoue I, Iguchi M, Tamai H, Ichinose M.	Dig Endosc
22847248	Prospective study on retinal nerve fibre layer changes after an acute episode of phacomorphic angle closure.	Lee JW, Lai JS, Yick DW, Yuen CY.	Int Ophthalmol
22241923	Combination therapy with low-dose transpupillary thermotherapy and intravitreal ranibizumab for neovascular age-related macular degeneration: a 24-month prospective randomised clinical study.	Soderberg AC, Algvere PV, Hengstler JC, Soderberg P, Seregard S, Kvanta A.	Br J Ophthalmol
22508022	The effect of the Nintendo Wii Fit and e-ercise in improving balance and quality of life in community dwelling elders.	Franco JR, Jacobs K, Inzerillo C, Kluzik J.	Technol Health Care
21457411	Improved functional ability and independence in activities of daily living for older adults at high risk of hospital readmission: a randomized controlled trial.	Courtney MD, Edwards HE, Chang AM, Parker AW, Finlayson K, Bradbury C, Nielsen Z.	J Eval Clin Pract
21911336	Effect of physical activity counseling on physical activity of older people in Finland (ISRCTN 07330512).	Rasinaho M, Hirvensalo M, TormÃ¤kangas T, Leinonen R, Lintunen T, Rantanen T.	Health Promot Int
23211271	REMCARE: reminiscence groups for people with dementia and their family caregivers - effectiveness and cost-effectiveness pragmatic multicentre randomised trial.	Woods RT, Bruce E, Edwards RT, Elvish R, Hoare Z, Hounsome B, Keady J, Moniz-Cook ED, Orgeta V, Orrell M, Rees J, Russell IT.	Health Technol Assess
21425346	The prevalence of dementia and depression in Taiwanese institutionalized leprosy patients, and the effectiveness evaluation of reminiscence therapy--a longitudinal, single-blind, randomized control study.	Su TW, Wu LL, Lin CP.	Int J Geriatr Psychiatry
22342390	Effects of coenzyme Q10 supplementation on inflammatory markers (high-sensitivity C-reactive protein, interleukin-6, and homocysteine) in patients with coronary artery disease.	Lee BJ, Huang YC, Chen SJ, Lin PT.	Nutrition
22056537	Effects of strength training versus power training on physical performance in prefrail community-dwelling older adults.	Drey M, Zech A, Freiberger E, Bertsch T, Uter W, Sieber CC, Pfeifer K, Bauer JM.	Gerontology
23075701	Oral sapacitabine for the treatment of acute myeloid leukaemia in elderly patients: a randomised phase 2 study.	Kantarjian H, Faderl S, Garcia-Manero G, Luger S, Venugopal P, Maness L, Wetzler M, Coutre S, Stock W, Cla-ton D, Goldberg SL, Arellano M, Strickland SA, Seiter K, Schiller G, Jabbour E, Chiao J, Plunkett W.	Lancet Oncol
22575396	Palliative management for patients with subacute obstruction and stage IV unresectable rectosigmoid cancer: colostomy versus endoscopic stenting: final results of a prospective randomized trial.	Fiori E, Lamazza A, Schillaci A, Femia S, Demasi E, Decesare A, Sterpetti AV.	Am J Surg
22306121	HORIZON: an open-label e-tension trial of ranibizumab for choroidal neovascularization secondary to age-related macular degeneration.	Singer MA, Awh CC, Sadda S, Freeman WR, Antoszyk AN, Wong P, Tuomi L.	Ophthalmology
22959217	Long-term use of standardised Ginkgo biloba e-tract for the prevention of Alzheimer's disease (GuidAge): a randomised placebo-controlled trial.	Vellas B, Coley N, Ousset PJ, Berrut G, Dartigues JF, Dubois B, Grandjean H, Pasquier F, Piette F, Robert P, Touchon J, Garnier P, Mathie--Fortunet H, Andrieu S; GuidAge Study Group.	Lancet Neurol
22324753	Long-term effects of three multicomponent e-ercise interventions on physical performance and fall-related psychological outcomes in community-dwelling older adults: a randomized controlled trial.	Freiberger E, HÃ¤berle L, Spirduso WW, Zijlstra GA.	J Am Geriatr Soc
22340303	The use of digital photographs for the diagnosis of hand osteoarthritis: the AGES-Reykjavik study.	Jonsson H, Helgadottir GP, Aspelund T, Sverrisdottir JE, Eiriksdottir G, Sigurdsson S, Eliasson GJ, Jonsson A, Ingvarsson T, Harris TB, Launer L, Gudnason V.	BMC Musculoskelet Disord
22114200	Sensitivity to change and responsiveness of four balance measures for community-dwelling older adults.	Pardasaney PK, Latham NK, Jette AM, Wagenaar RC, Ni P, Slavin MD, Bean JF.	Phys Ther
22336473	Cilostazol versus aspirin therapy in patients with chronic dizziness after ischemic stroke.	Johkura K, Yoshida TN, Kudo Y, Nakae Y, Momoo T, Kuroiwa Y.	Clin Neurol Neurosurg
21925716	Effect on perfusion chamber thrombus size in patients with atrial fibrillation during anticoagulant treatment with oral direct thrombin inhibitors, AZD0837 or -imelagatran, or with vitamin K antagonists.	Wolzt M, Eriksson UG, Gouya G, Leuchten N, Kapiotis S, Elg M, Schutzer KM, Zetterstrand S, Holmberg M, WÃ¥hlander K.	Thromb Res
22523305	On-pump versus off-pump coronary artery bypass surgery in elderly patients: results from the Danish on-pump versus off-pump randomization study.	Houlind K, Kjeldsen BJ, Madsen SN, Rasmussen BS, Holme SJ, Nielsen PH, Mortensen PE; DOORS Study Group.	Circulation
23173755	Comparative study between Levobupivacaine and Bupivacaine for hernia surgery in the elderly.	Compagna R, Vigliotti G, Coretti G, Amato M, Aprea G, Puzziello A, Militello C, Iacono F, Prezioso D, Amato B.	BMC Surg
22337760	The influence of mean arterial blood pressure during cardiopulmonary bypass on postoperative renal dysfunction in elderly patients.	Sirvinskas E, Benetis R, Raliene L, Andrejaitiene J.	Perfusion
22323351	Effect of an 8-weeks aerobic training program in elderly on o-idative stress and HSP72 e-pression in leukocytes during antio-idant supplementation.	Simar D, Malatesta D, Mas E, Delage M, Caillaud C.	J Nutr Health Aging
22648253	A prospective study on different methods for the treatment of choroidal neovascularization. The efficacy of verteporfin photodynamic therapy, intravitreal bevacizumab and transpupillary thermotherapy in patients with neovascular age-related macular degeneration.	Nowak MS, Jurowski P, Grzybowski A, GoÅ? R, Pastuszka M, Kapica A, Å?migielski J.	Med Sci Monit
22220945	Effects of intravenous de-medetomidine on low-dose bupivacaine spinal anaesthesia in elderly patients.	Hong JY, Kim WO, Yoon Y, Choi Y, Kim SH, Kil HK.	Acta Anaesthesiol Scand
23180520	Comparison of right ventricular ape- and right ventricular outflow tract septum pacing in the elderly with normal left ventricular ejection fraction: long-term follow-up.	Zhang H-, Qian J, Hou FQ, Liu YN, Mao JH.	Kardiol Pol
21986341	CORDIAL: cognitive rehabilitation and cognitive-behavioral treatment for early dementia in Alzheimer disease: a multicenter, randomized, controlled trial.	Kurz A, Thone-Otto A, Cramer B, Egert S, Frolich L, Gertz HJ, Kehl V, Wagenpfeil S, Werheid K.	Alzheimer Dis Assoc Disord
22513649	Effect of vertebroplasty on pain relief, quality of life, and the incidence of new vertebral fractures: a 12-month randomized follow-up, controlled trial.	Blasco J, Martinez-Ferrer A, Macho J, San Roman L, Pomes J, Carrasco J, Monegal A, GuaÃ±abens N, Peris P.	J Bone Miner Res
22700528	Intensive versus subcutaneous insulin in patients with hyperacute stroke: results from the randomized INSULINFARCT trial.	Rosso C, Corvol JC, Pires C, Crozier S, Attal Y, Jacqueminet S, Deltour S, Multlu G, Leger A, Meresse I, Payan C, Dormont D, Samson Y.	Stroke
21932036	Comparison of ma-imal and more ma-imal intermittent androgen blockade during 5-year treatment of advanced prostate cancer T3N-M--1.	Dutkiewicz SA.	Int Urol Nephrol
22338070	Amino acid absorption and subsequent muscle protein accretion following graded intakes of whey protein in elderly men.	Pennings B, Groen B, de Lange A, Gijsen AP, Zorenc AH, Senden JM, van Loon LJ.	Am J Physiol Endocrinol Metab
22689805	Multicenter, randomized, open-label, phase III trial of decitabine versus patient choice, with physician advice, of either supportive care or low-dose cytarabine for the treatment of older patients with newly diagnosed acute myeloid leukemia.	Kantarjian HM, Thomas -G, Dmoszynska A, Wierzbowska A, Mazur G, Mayer J, Gau JP, Chou WC, Buckstein R, Cermak J, Kuo CY, Oriol A, Ravandi F, Faderl S, Delaunay J, LysÃ¡k D, Minden M, Arthur C.	J Clin Oncol
22251379	Can an old dog learn (and want to experience) new tricks? Cognitive training increases openness to experience in older adults.	Jackson JJ, Hill PL, Payne BR, Roberts BW, Stine-Morrow EA.	Psychol Aging
22910287	Dose sparing intradermal trivalent influenza (2010/2011) vaccination overcomes reduced immunogenicity of the 2009 H1N1 strain.	Hung IF, Levin Y, To KK, Chan KH, Zhang AJ, Li P, Li C, -u T, Wong TY, Yuen KY.	Vaccine
22682610	Risk of falls in older people during fast-walking--the TASCOG study.	Callisaya ML, Blizzard L, McGinley JL, Srikanth VK.	Gait Posture
23046330	Adjunctive ultrasonography to minimize iodinated contrast administration during carotid artery stenting: a randomized trial.	Varcoe RL, Nammuni I, Lenno- AF, Yang JL, Crowe P, Walsh WR.	J Endovasc Ther
22090466	Compression stockings with moderate pressure are able to reduce chronic leg oedema.	Mosti G, Picerni P, Partsch H.	Phlebology
22197474	Efficacy and safety of do-epin 6 mg in a four-week outpatient trial of elderly adults with chronic primary insomnia.	Lankford A, Rogowski R, Essink B, Ludington E, Heith Durrence H, Roth T.	Sleep Med
21769664	Impact of clinical fractures on health-related quality of life is dependent on time of assessment since fracture: results from the FREEDOM trial.	Silverman S, Viswanathan HN, Yang YC, Wang A, Boonen S, Ragi-Eis S, Fardellone P, Gilchrist N, Lips P, Nevitt M, Palacios Gil-AntuÃ±ano S, Pavelka K, Revicki D, Simon J, Macarios D, Siris ES.	Osteoporos Int
21715139	Muscle weakness in septic patients requiring mechanical ventilation: protective effect of transcutaneous neuromuscular electrical stimulation.	Rodriguez PO, Setten M, Maskin LP, Bonelli I, Vidomlansky SR, Attie S, Frosiani SL, Kozima S, Valentini R.	J Crit Care
21895543	Cyclophosphamide, do-orubicin, vincristine, prednisone and ritu-imab versus epirubicin, cyclophosphamide, vinblastine, prednisone and ritu-imab for the initial treatment of elderly fit" patients with diffuse large B-cell lymphoma: results from the ANZINTER3 trial of the Intergruppo Italiano Linfomi..."	Merli F, Luminari S, Rossi G, Mammi C, Marcheselli L, Tucci A, Ilariucci F, Chiappella A, Musso M, Di Rocco A, Stelitano C, Alvarez I, Baldini L, Mazza P, Salvi F, Arcari A, Fragasso A, Gobbi PG, Liberati AM, Federico M.	Leuk Lymphoma
21992849	Effect of low-dose human atrial natriuretic peptide on postoperative atrial fibrillation in patients undergoing pulmonary resection for lung cancer: a double-blind, placebo-controlled study.	Nojiri T, Yamamoto K, Maeda H, Takeuchi Y, Funakoshi Y, Inoue M, Okumura M.	J Thorac Cardiovasc Surg
22776937	Intravitreal bevacizumab in advanced-stage neovascular age-related macular degeneration with visual acuity lower than 20/200.	Parodi MB, Cascavilla M, Papayannis A, Kontadakis DS, Bandello F, Iacono P.	Arch Ophthalmol
22980639	Effect of femtosecond laser fragmentation of the nucleus with different softening grid sizes on effective phaco time in cataract surgery.	Conrad-Hengerer I, Hengerer FH, Schultz T, Dick HB.	J Cataract Refract Surg
22280855	A randomized prospective trial to assess the impact of transurethral resection in narrow band imaging modality on non-muscle-invasive bladder cancer recurrence.	Naselli A, Introini C, Timossi L, Spina B, Fontana V, Pezzi R, Germinale F, Bertolotto F, Puppo P.	Eur Urol
22770692	High thoracic epidural analgesia in cardiac surgery: part 2-high thoracic epidural analgesia does not reduce time in or improve quality of recovery in the intensive care unit.	Nielsen DV, Bhavsar R, Greisen J, Ryhammer PK, Sloth E, Jakobsen CJ.	J Cardiothorac Vasc Anesth
21753727	NG--4010, a capsaicin 8% dermal patch, administered alone or in combination with systemic neuropathic pain medications, reduces pain in patients with postherpetic neuralgia.	Irving G, Backonja M, Rauck R, Webster LR, Tobias JK, Vanhove GF.	Clin J Pain
21853265	Gut microbiota of healthy elderly NSAID users is selectively modified with the administration of Lactobacillus acidophilus NCFM and lactitol.	Bjorklund M, Ouwehand AC, Forssten SD, NikkilÃ¤ J, Tiihonen K, Rautonen N, Lahtinen SJ.	Age (Dordr)
22092512	Is oral health-related quality of life stable following rehabilitation with mandibular two-implant overdentures?	Jabbour Z, Emami E, de Grandmont P, Rompre PH, Feine JS.	Clin Oral Implants Res
22173517	A randomized, double-blind, placebo-controlled trial of selective digestive decontamination using oral gentamicin and oral polymy-in E for eradication of carbapenem-resistant Klebsiella pneumoniae carriage.	Saidel-Odes L, Polachek H, Peled N, Riesenberg K, Schlaeffer F, Trabelsi Y, Eskira S, Yousef B, Smolykov R, Codish S, Borer A.	Infect Control Hosp Epidemiol
22469559	Health-related quality of life in elderly, newly diagnosed multiple myeloma patients treated with VMP vs. MP: results from the VISTA trial.	Delforge M, Dhawan R, Robinson D Jr, Meunier J, Regnault A, Esseltine DL, Cakana A, van de Velde H, Richardson PG, San Miguel JF.	Eur J Haematol
22627991	Relation between change in blood pressure in acute stroke and risk of early adverse events and poor outcome.	Sandset EC, Murray GD, Bath PM, Kjeldsen SE, Berge E; Scandinavian Candesartan Acute Stroke Trial (SCAST) Study Group.	Stroke
22842557	Balloon Kyphoplasty versus KIVA vertebral Augmentation. Comparison of two Techniques for Osteoporotic Vertebral Body Fractures: A Prospective Randomized Study.	Panagiotis K, Konstantinos V, Thomas R, Vasilios V.	Spine (Phila Pa 1976)
23271905	High pressure versus high intensity noninvasive ventilation in stable hypercapnic chronic obstructive pulmonary disease: a randomized crossover trial.	Murphy PB, Brignall K, Moxham J, Polkey MI, Davidson AC, Hart N.	Int J Chron Obstruct Pulmon Dis
22083263	Stimulating visual exploration of the neglected space in the early stage of stroke by hemifield eye-patching: a randomized controlled trial in patients with right brain damage.	Ianes P, Varalta V, Gandolfi M, Picelli A, Corno M, Di Matteo A, Fiaschi A, Smania N.	Eur J Phys Rehabil Med
22658231	Is femoral nerve block necessary during total knee arthroplasty?: a randomized controlled trial.	Widmer BJ, Scholes CJ, Pattullo GG, Oussedik SI, Parker DA, Coolican MR.	J Arthroplasty
23110444	Clinically relevant pain relief with an ibuprofen-releasing foam dressing: results from a randomized, controlled, double-blind clinical trial in e-uding, painful venous leg ulcers.	Fogh K, Andersen MB, Bischoff-Mikkelsen M, Bause R, Zutt M, Schilling S, Schmutz JL, Borbujo J, Jimenez JA, Cartier H, JÃ¸rgensen B.	Wound Repair Regen
23427383	Effect of Liandouqingmai Recipe on life quality and vascular endothelial injury in patients with coronary heart disease.	Zhu H, Lu S, Su W, Gong S, Zhang Z, Li P.	J Tradit Chin Med
22008208	Effects of o-ygen on e-ertional dyspnoea and e-ercise performance in patients with chronic obstructive pulmonary disease.	Miki K, Maekura R, Hiraga T, Kitada S, Miki M, Yoshimura K, Tateishi Y.	Respirology
22215856	Myocardial ischemic events in patients with atrial fibrillation treated with dabigatran or warfarin in the RE-LY (Randomized Evaluation of Long-Term Anticoagulation Therapy) trial.	Hohnloser SH, Oldgren J, Yang S, Wallentin L, Ezekowitz M, Reilly P, Eikelboom J, Brueckmann M, Yusuf S, Connolly SJ.	Circulation
22339573	The safety of an adenosine A(1)-receptor antagonist, rolofylline, in patients with acute heart failure and renal impairment: findings from PROTECT.	Teerlink JR, Iragui VJ, Mohr JP, Carson PE, Hauptman PJ, Lovett DH, Miller AB, PiÃ±a IL, Thomson S, Varosy PD, Zile MR, Cleland JG, Givertz MM, Metra M, Ponikowski P, Voors AA, Davison BA, Cotter G, Wolko D, Delucca P, Salerno CM, Mansoor GA, et al.	Drug Saf
21896676	A physiotherapy service to an emergency extended care unit does not decrease admission rates to hospital: a randomised trial.	Jesudason C, Stiller K, McInnes M, Sullivan T.	Emerg Med J
22302182	Effect of caffeine on adenosine-induced reversible perfusion defects assessed by automated analysis.	Lee JC, Fraser JF, Barnett AG, Johnson LP, Wilson MG, McHenry CM, Walters DL, Warnholtz CR, Khafagi FA.	J Nucl Cardiol
22617914	Good diagnostic performance of early migration as a predictor of late aseptic loosening of acetabular cups: results from ten years of follow-up with Roentgen stereophotogrammetric analysis (RSA).	Nieuwenhuijse MJ, Valstar ER, Kaptein BL, Nelissen RG.	J Bone Joint Surg Am
23118535	Randomized trial of pragmatic education for low-risk COPD patients: impact on hospitalizations and emergency department visits.	Siddique HH, Olson RH, Parenti CM, Rector TS, Caldwell M, Dewan NA, Rice KL.	Int J Chron Obstruct Pulmon Dis
23171095	Long-term comparison of endovascular and open repair of abdominal aortic aneurysm.	Lederle FA, Freischlag JA, Kyriakides TC, Matsumura JS, Padberg FT Jr, Kohler TR, Kougias P, Jean-Claude JM, Cikrit DF, Swanson KM; OVER Veterans Affairs Cooperative Study Group.	N Engl J Med
22018935	A diet, physical activity, and stress reduction intervention in men with rising prostate-specific antigen after treatment for prostate cancer.	Hebert JR, Hurley TG, Harmon BE, Heiney S, Hebert CJ, Steck SE.	Cancer Epidemiol
22170799	The impact of medication on vitamin D status in older individuals.	Sohl E, van Schoor NM, de Jongh RT, de Vries OJ, Lips P.	Eur J Endocrinol
22361918	Landiolol, an ultra-short-acting Î²â?-blocker, more effectively terminates atrial fibrillation than diltiazem after open heart surgery: prospective, multicenter, randomized, open-label study (JL-KNIGHT study).	Sakamoto A, Kitakaze M, Takamoto S, Namiki A, Kasanuki H, Hosoda S; JL-KNIGHT study group.	Circ J
22749425	Recovery of overall exercise ability, quality of life, and continence after 12-week combined e-ercise intervention in elderly patients who underwent radical prostatectomy: a randomized controlled study.	Park SW, Kim TN, Nam JK, Ha HK, Shin DG, Lee W, Kim MS, Chung MK.	Urology
22751354	Cognitive function in elderly can be ameliorated by training in temporal information processing.	Szelag E, Skolimowska J.	Restor Neurol Neurosci
22079769	Inferior tilt of the glenoid component does not decrease scapular notching in reverse shoulder arthroplasty: results of a prospective randomized study.	Edwards TB, Trappey GJ, Riley C, O'Connor DP, Elkousy HA, Gartsman GM.	J Shoulder Elbow Surg
22205496	A randomized trial of budiodarone in paro-ysmal atrial fibrillation.	Ezekowitz MD, Nagarakanti R, Lubinski A, Bandman O, Canafa- D, Ellis DJ, Milner PG, Ziola M, Thibault B, Hohnloser SH; PASCAL Investigators.	J Interv Card Electrophysiol
22343689	Comparative efficacy of different doses of fibrin sealant to reduce bleeding after total knee arthroplasty.	Notarnicola A, Moretti L, Martucci A, Spinarelli A, Tafuri S, Pesce V, Moretti B.	Blood Coagul Fibrinolysis
22430092	Influence of rescrubbing before laparotomy closure on abdominal wound infection after colorectal cancer surgery: results of a multicenter randomized clinical trial.	Ortiz H, Armendariz P, Kreisler E, Garcia-Granero E, Espin-Basany E, Roig JV, MartÃ­n A, Parajo A, Valero G, MartÃ­nez M, Biondo S.	Arch Surg
22782367	Use of a prosthetic mesh to prevent parastomal hernia during laparoscopic abdominoperineal resection: a randomized controlled trial.	LÃ³pez-Cano M, Lozoya-Trujillo R, Quiroga S, SÃ¡nchez JL, Vallribera F, MartÃ­ M, Jimenez LM, Armengol-Carrasco M, EspÃ­n E.	Hernia
22395923	Glasgow supported self-management trial (GSuST) for patients with moderate to severe COPD: randomised controlled trial.	Bucknall CE, Miller G, Lloyd SM, Cleland J, McCluskey S, Cotton M, Stevenson RD, Cotton P, McConnachie A.	BMJ
22115409	Transurethral resection of prostate with plasmakinetic energy: 100 months results of a prospective randomized trial.	Muslumanoglu AY, Yuruk E, Binbay M, Akman T.	BJU Int
22116795	Functional and muscular effects of neuromuscular electrical stimulation in patients with severe COPD: a randomized clinical trial.	Vivodtzev I, Debigare R, Gagnon P, Mainguy V, Saey D, Dube A, Pare MÃ?, Belanger M, Maltais F.	Chest
22348319	A prospective, comparative trial of standard and breath-actuated nebulizer: efficacy, safety, and satisfaction.	Arunthari V, Bruinsma RS, Lee AS, Johnson MM.	Respir Care
22454414	Randomized, double-blind, placebo-controlled phase III trial comparing doceta-el and prednisone with or without bevacizumab in men with metastatic castration-resistant prostate cancer: CALGB 90401.	Kelly WK, Halabi S, Carducci M, George D, Mahoney JF, Stadler WM, Morris M, Kantoff P, Monk JP, Kaplan E, Vogelzang NJ, Small EJ.	J Clin Oncol
22407057	Three-hour interval drain clamping reduces postoperative bleeding in total knee arthroplasty: a prospective randomized controlled trial.	Pornrattanamaneewong C, Narkbunnam R, Siriwattanasakul P, Chareancholvanich K.	Arch Orthop Trauma Surg
22316445	Tai chi and postural stability in patients with Parkinson's disease.	Li F, Harmer P, Fitzgerald K, Eckstrom E, Stock R, Galver J, Maddalozzo G, Batya SS.	N Engl J Med
22672732	The effects of respiratory training for chronic obstructive pulmonary disease patients: a randomised clinical trial.	Lin WC, Yuan SC, Chien JY, Weng SC, Chou MC, Kuo HW.	J Clin Nurs
23199586	Types of urethral catheter for reducing symptomatic urinary tract infections in hospitalised adults requiring short-term catheterisation: multicentre randomised controlled trial and economic evaluation of antimicrobial- and antiseptic-impregnated urethral catheters (the CATHETER trial).	Pickard R, Lam T, Maclennan G, Starr K, Kilonzo M, McPherson G, Gillies K, McDonald A, Walton K, Buckley B, Glazener C, Boachie C, Burr J, Norrie J, Vale L, Grant A, N'dow J.	Health Technol Assess
22000773	Evaluation of intracoronary adenosine to prevent periprocedural myonecrosis in elective percutaneous coronary intervention (from the PREVENT-ICARUS Trial).	De Luca G, Iorio S, Venegoni L, Marino P.	Am J Cardiol
22822010	A randomized trial comparing buttonhole with rope ladder needling in conventional hemodialysis patients.	MacRae JM, Ahmed SB, Atkar R, Hemmelgarn BR.	Clin J Am Soc Nephrol
22688312	Clopidogrel trial in patients with elective percutaneous coronary intervention for stable angina and old myocardial infarction (CLEAN).	Isshiki T, Kimura T, Ueno T, Nakamura M, Igarashi K, Yokoi H, Kobayashi M, Ikari Y.	Int Heart J
22595983	Dyspnea, chest wall hyperinflation, and rib cage distortion in e-ercising patients with chronic obstructive pulmonary disease.	Bruni GI, Gigliotti F, Binazzi B, Romagnoli I, Duranti R, Scano G.	Med Sci Sports E-erc
21820829	Dose modulated retrospective ECG-gated versus non-gated 64-row CT angiography of the aorta at the same radiation dose: comparison of motion artifacts, diagnostic confidence and signal-to-noise-ratios.	Schernthaner RE, Stadler A, Beitzke D, Homolka P, Weber M, Lammer J, Czerny M, Loewe C.	Eur J Radiol
21922202	Prophylactic treatment of local reactions to i.v. vinorelbine: a randomized study.	Quant E, Bergman B.	Support Care Cancer
22323092	Activated partial thromboplastin time measurement is not associated with clinical outcomes in patients with high-risk non-ST-segment elevation acute coronary syndromes treated with unfractionated heparin.	Thomas MP, Mahaffey KW, Chiswell K, Cohen M, Kontos MC, Antman EM, Ferguson JJ, Califf RM, Goodman SG, Becker RC.	J Thromb Thrombolysis
22440491	Prasugrel versus tirofiban bolus with or without short post-bolus infusion with or without concomitant prasugrel administration in patients with myocardial infarction undergoing coronary stenting: the FABOLUS PRO (Facilitation through Aggrastat By drOpping or shortening Infusion Line in patients wit...	Valgimigli M, Tebaldi M, Campo G, Gambetti S, Bristot L, Monti M, Parrinello G, Ferrari R; FABOLUS PRO Investigators.	JACC Cardiovasc Interv
22579379	Correlation in rectal cancer between clinical tumor response after neoadjuvant radiotherapy and sphincter or organ preservation: 10-year results of the Lyon R 96-02 randomized trial.	Ortholan C, Romestaing P, Chapet O, Gerard JP.	Int J Radiat Oncol Biol Phys
22906140	Efficacy of tuned waveforms based on different membrane time constants on defibrillation thresholds: primary results from the POWER trial.	Doshi SK, Pittaro MD, Reeves R, Boyce K, Payne JP, Kroll MW, Graumann RJ, Oza AL, Val-Mejias JE.	Pacing Clin Electrophysiol
22965699	Clinical study of western medicine combined with Chinese medicine based on syndrome differentiation in the patients with polarized hypertension.	Chen SL, Liu -Y, -u WM, Mei WY, Chen -L.	Chin J Integr Med
22074592	Effectiveness and tissue compatibility of a 12-week treatment of chronic venous leg ulcers with an octenidine based antiseptic--a randomized, double-blind controlled study.	Vanscheidt W, Harding K, Teot L, Siebert J.	Int Wound J
22627597	Low contrast agent and radiation dose protocol for hepatic dynamic CT of thin adults at 256-detector row CT: effect of low tube voltage and hybrid iterative reconstruction algorithm on image quality.	Nakaura T, Nakamura S, Maruyama N, Funama Y, Awai K, Harada K, Uemura S, Yamashita Y.	Radiology
21909698	Randomised multicentre trial of circular stapling devices.	Folkesson J, Brown SS, Gunnarsson U, PÃ¥hlman L.	Int J Colorectal Dis
21829006	Comparison between single-injection inferomedial and inferotemporal peribulbar blockades before cataract surgery.	Mahdy RA, Ghanem MT.	Ophthalmologica
21427067	Efficacy of venlafa-ine for the prevention and relief of o-aliplatin-induced acute neuroto-icity: results of EFFO-, a randomized, double-blind, placebo-controlled phase III trial.	Durand JP, Deplanque G, Montheil V, Gornet JM, Scotte F, Mir O, Cessot A, Coriat R, Raymond E, Mitry E, Herait P, Yataghene Y, Goldwasser F.	Ann Oncol
22310097	Accuracy of robot-assisted placement of lumbar and sacral pedicle screws: a prospective randomized comparison to conventional freehand screw implantation.	Ringel F, Stuer C, Reinke A, Preuss A, Behr M, Auer F, Stoffel M, Meyer B.	Spine (Phila Pa 1976)
22626743	Remote monitoring reduces healthcare use and improves quality of care in heart failure patients with implantable defibrillators: the evolution of management strategies of heart failure patients with implantable defibrillators (EVOLVO) study.	Landolina M, Perego GB, Lunati M, Curnis A, Guenzati G, Vicentini A, Parati G, Borghi G, Zanaboni P, Valsecchi S, Marzegalli M.	Circulation
23131078	Ultrafiltration in decompensated heart failure with cardiorenal syndrome.	Bart BA, Goldsmith SR, Lee KL, Givertz MM, O'Connor CM, Bull DA, Redfield MM, Deswal A, Rouleau JL, LeWinter MM, Ofili EO, Stevenson LW, Semigran MJ, Felker GM, Chen HH, Hernandez AF, Anstrom KJ, McNulty SE, Velazquez EJ, Ibarra JC, Mascette AM, Braunwald E; et al.	N Engl J Med
22623206	Robotic gait training is not superior to conventional treadmill training in parkinson disease: a single-blind randomized controlled trial.	Carda S, Invernizzi M, Baricich A, Comi C, Croquelois A, Cisari C.	Neurorehabil Neural Repair
22659994	A combination of galantamine and memantine modifies cognitive function in subjects with amnestic MCI.	Peters O, Lorenz D, Fesche A, Schmidtke K, Hull M, Perneczky R, Ruther E, Moller HJ, Jessen F, Maier W, Kornhuber J, Jahn H, Luckhaus C, Gertz HJ, Schroder J, Pantel J, Teipel S, Wellek S, Frolich L, Heuser I.	J Nutr Health Aging
22665339	Five-year follow-up results of a randomized controlled trial comparing bipolar plasmakinetic and monopolar transurethral resection of the prostate.	-ie CY, Zhu GB, Wang -H, Liu -B.	Yonsei Med J
23157714	The effect of a trunk release maneuver on Peak Pressure Inde-, trunk displacement and perceived discomfort in older adults seated in a High Fowler's position: a randomized controlled trial.	Best KL, Desharnais G, Boily J, Miller WC, Camp PG.	BMC Geriatr
22293584	Administration of highly purified eicosapentaenoic acid to statin-treated diabetic patients further improves vascular function.	Sasaki J, Miwa T, Odawara M.	Endocr J
22278377	A randomized phase-II trial comparing sequential and concurrent paclita-el with oral or parenteral fluorinated pyrimidines for advanced or metastatic gastric cancer.	Nishikawa K, Morita S, Matsui T, Kobayashi M, Takeuchi Y, Takahashi I, Sato S, Miyashita Y, Tsuburaya A, Sakamoto J, Kakeji Y, Baba H.	Gastric Cancer
23194490	Testosterone therapy during e-ercise rehabilitation in male patients with chronic heart failure who have low testosterone status: a double-blind randomized controlled feasibility study.	Stout M, Tew GA, Doll H, Zwierska I, Woodroofe N, Channer KS, Sa-ton JM.	Am Heart J
23224924	Improvement of ventricular function in systolic heart failure patients with oral L-citrulline supplementation.	Balderas-Munoz K, Castillo-MartÃ­nez L, Orea-Tejeda A, Infante-VÃ¡zquez O, Utrera-Lagunas M, MartÃ­nez-Memije R, Keirns-Davis C, Becerra-Luna B, SÃ¡nchez-Vidal G.	Cardiol J
21846962	Early versus late pulmonary rehabilitation in chronic obstructive pulmonary disease patients with acute e-acerbations: a randomized trial.	Puhan MA, Spaar A, Frey M, Turk A, BrÃ¤ndli O, Ritscher D, Achermann E, Kaelin R, Karrer W.	Respiration
21954131	Long-term outcomes and costs of an integrated rehabilitation program for chronic knee pain: a pragmatic, cluster randomized, controlled trial.	Hurley MV, Walsh NE, Mitchell H, Nicholas J, Patel A.	Arthritis Care Res (Hoboken)
22275153	The effect of rectal distension on bladder function in patients with overactive bladder.	Akl MN, Jacob K, Klauschie J, Crowell MD, Kho RM, Cornella JL.	Neurourol Urodyn
22499288	Losartan versus atenolol-based antihypertensive treatment reduces cardiovascular events especially well in elderly patients: the Losartan Intervention For Endpoint reduction in hypertension (LIFE) study.	Ruwald AC, Westergaard B, Sehestedt T, Kjeldsen SE, Lindholm LH, Wachtell K, Devereu- RB, Ibsen H, Nieminen MS, Dahlof B, Olsen MH.	J Hypertens
22682555	Ramipril sensitizes platelets to nitric o-ide: implications for therapy in high-risk patients.1	Willoughby SR, Rajendran S, Chan WP, Procter N, Leslie S, Liberts EA, Heresztyn T, Chirkov YY, Horowitz JD.	J Am Coll Cardiol
21791142	Marine n-3 fatty acids, atrial fibrillation and QT interval in haemodialysis patients.	Kirkegaard E, Svensson M, Strandhave C, Schmidt EB, JÃ¸rgensen KA, Christensen JH.	Br J Nutr
22045128	Assessment of neuromuscular block at the orbicularis oris, corrugator supercilii, and adductor pollicis muscles.	Saitoh Y, Sashiyama H, Oshima T, Nakata Y, Sato J.	J Anesth
22964355	Massage therapy for cardiac surgery patients--a randomized trial.	Braun LA, Stanguts C, Casanelia L, Spitzer O, Paul E, Varda-is NJ, Rosenfeldt F.	J Thorac Cardiovasc Surg
22647280	Chair rising exercise is more effective than one-leg standing exercise in improving dynamic body balance: a randomized controlled trial.	Yamashita F, Iwamoto J, Osugi T, Yamazaki M, Takakuwa M.	J Musculoskelet Neuronal Interact
22605573	Dietary fat types and 4-year cognitive change in community-dwelling older women.	Okereke OI, Rosner BA, Kim DH, Kang JH, Cook NR, Manson JE, Buring JE, Willett WC, Grodstein F.	Ann Neurol
22615190	L-Carnitine plus cilostazol versus cilostazol alone for the treatment of claudication in patients with peripheral artery disease: a multicenter, randomized, double-blind, placebo-controlled trial.	Goldenberg NA, Krantz MJ, Hiatt WR.	Vasc Med
22961024	Daily disinfection of high-touch surfaces in isolation rooms to reduce contamination of healthcare workers' hands.	Kundrapu S, Sunkesula V, Jury LA, Sitzlar BM, Donskey CJ.	Infect Control Hosp Epidemiol
22963812	Effect on walking distance and atherosclerosis progression of a nitric o-ide-donating agent in intermittent claudication.	Gresele P, Migliacci R, Arosio E, Bonizzoni E, Minuz P, Violi F; NC- 4016---208 Study Group.	J Vasc Surg
21715117	Preoperative assessment of longitudinal e-tent of bile duct cancers using MDCT with multiplanar reconstruction and minimum intensity projections: comparison with MR cholangiography.	Ryoo I, Lee JM, Park HS, Han JK, Choi BI.	Eur J Radiol
22058145	Risk modification of colorectal adenoma by CYP7A1 polymorphisms and the role of bile acid metabolism in carcinogenesis.	Wertheim BC, Smith JW, Fang C, Alberts DS, Lance P, Thompson PA.	Cancer Prev Res (Phila)
22394412	Intravenous diuretic and vasodilator therapy reduce plasma brain natriuretic peptide levels in acute e-acerbation of chronic obstructive pulmonary disease.	Zhang J, Zhao G, Yu -, Pan -.	Respirology
22824168	L-Carnitine-supplementation in advanced pancreatic cancer (CARPAN)--a randomized multicentre trial.	Kraft M, Kraft K, GÃ¤rtner S, Mayerle J, Simon P, Weber E, Schutte K, Stieler J, Koula-Jenik H, Holzhauer P, Grober U, Engel G, Muller C, Feng YS, Aghdassi A, Nitsche C, Malfertheiner P, Patrzyk M, Kohlmann T, Lerch MM.	Nutr J
23043755	Use of a sealant to prevent prolonged air leaks after lung resection: a prospective randomized study.	Lequaglie C, Giudice G, Marasco R, Morte AD, Gallo M.	J Cardiothorac Surg
23050945	No changes of cholesterol levels with a commercially available glucosamine product in patients treated with lipid lowering drugs: a controlled, randomised, open cross-over trial.	Eggertsen R, Andreasson A, Andren L.	BMC Pharmacol To-icol
22202972	The effects of the Kampo medicine (Japanese herbal medicine) Daikenchuto" on the surgical inflammatory response following laparoscopic colorectal resection."	Yoshikawa K, Shimada M, Nishioka M, Kurita N, Iwata T, Morimoto S, Miyatani T, Komatsu M, Kashihara H, Mikami C.	Surg Today
22424016	Five-year results of the Multicenter Randomized Controlled Open-Label Study of the CYPHER Sirolimus-Eluting Stent in the Treatment of Diabetic Patients with De Novo Native Coronary Artery Lesions (SCORPIUS) study: a German multicenter investigation on the effectiveness of sirolimus-eluting stents in...	Sinning JM, Baumgart D, Werner N, Klauss V, Baer FM, Hartmann F, Dre-ler H, Motz W, Klues H, Voelker W, Pfannebecker T, Stoll HP, Nickenig G; SCORPIUS Study.	Am Heart J
22804816	Comparison of plaque accumulation and soft-tissue blood flow with the use of full-arch implant-supported fi-ed prostheses with mucosal surfaces of different materials: a randomized clinical study.	Kanao M, Nakamoto T, Kajiwara N, Kondo Y, Masaki C, Hosokawa R.	Clin Oral Implants Res
22933669	Gender-specific high-fle-ion knee prosthesis in Indian women: a prospective randomised study.	Singh H, Mittal V, Nadkarni B, Agarwal S, Gulati D.	J Orthop Surg (Hong Kong)
22939276	A randomized prospective multicenter trial of a novel vascular sealant.	Stone WM, Cull DL, Money SR.	Ann Vasc Surg
23488361	Nurse practitioners in postoperative cardiac surgery: are they effective?	Goldie CL, Prodan-Bhalla N, Mackay M.	Can J Cardiovasc Nurs
22459388	Effects of Vitamin D supplementation on markers of vascular function after myocardial infarction-A randomised controlled trial.	Witham MD, Dove FJ, Khan F, Lang CC, Belch JJ, Struthers AD.	Int J Cardiol
22300693	Ursodeo-ycholic acid in patients with chronic heart failure: a double-blind, randomized, placebo-controlled, crossover trial.	von Haehling S, Schefold JC, Jankowska EA, Springer J, Vazir A, Kalra PR, Sandek A, Fauler G, Stojakovic T, Trauner M, Ponikowski P, Volk HD, Doehner W, Coats AJ, Poole-Wilson PA, Anker SD.	J Am Coll Cardiol
22595810	Effects of home versus hospital-based e-ercise training in chronic heart failure.	Cowie A, Thow MK, Granat MH, Mitchell SL.	Int J Cardiol
22769235	A multicenter randomized double-masked comparative study of different preparations of alendronate in osteoporosis - monthly (four weeks) intravenous versus once weekly oral administrations.	Shiraki M, Nakamura T, Fukunaga M, Sone T, Usami A, Inoue T.	Curr Med Res Opin
22854323	Beneficial effects of high-dose atorvastatin pretreatment on renal function in patients with acute ST-segment elevation myocardial infarction undergoing emergency percutaneous coronary intervention.	Li W, Fu -, Wang Y, Li -, Yang Z, Wang -, Geng W, Gu -, Hao G, Jiang Y, Fan W, Wu W, Li S.	Cardiology
22152978	Effects of e-ercise training on pulmonary mechanics and functional status in patients with prolonged mechanical ventilation.	Chen YH, Lin HL, Hsiao HF, Chou LT, Kao KC, Huang CC, Tsai YH.	Respir Care
22796472	Investigation of a novel algorithm for synchronized left-ventricular pacing and ambulatory optimization of cardiac resynchronization therapy: results of the adaptive CRT trial.	Martin DO, Lemke B, Birnie D, Krum H, Lee KL, Aonuma K, Gasparini M, Starling RC, Milasinovic G, Rogers T, Sambelashvili A, Gorcsan J 3rd, Houmsse M; Adaptive CRT Study Investigators.	Heart Rhythm
23094034	A booklet on participants' rights to improve consent for clinical research: a randomized trial.	Benatar JR, Mortimer J, Stretton M, Stewart RA.	PLoS One
21782418	Health-related quality of life (HRQoL) after multimodal treatment for primarily non-resectable rectal cancer. Long-term results from a phase III study.	Braendengen M, Tveit KM, Hjermstad MJ, Johansson H, Berglund Ã?, Brandberg Y, Glimelius B.	Eur J Cancer
21990343	Impact of a randomized control group on perceived effectiveness of a Disease Management Programme for diabetes type 2.	Flamm M, Panisch S, Winkler H, Sonnichsen AC.	Eur J Public Health
22742720	Fibroblast growth factor 23 and parathyroid hormone after treatment with active vitamin D and sevelamer carbonate in patients with chronic kidney disease stage 3b, a randomized crossover trial.	Bleskestad IH, Bergrem H, Hartmann A, Godang K, GÃ¸ransson LG.	BMC Nephrol
22700717	Effects of lipid-lowering treatment on platelet reactivity and platelet-leukocyte aggregation in diabetic patients without and with chronic kidney disease: a randomized trial.	Almquist T, Jacobson SH, Lins PE, Farndale RW, Hjemdahl P.	Nephrol Dial Transplant
22344189	Comparison of trabeculectomy and E--PRESS implantation in fellow eyes of the same patient: a prospective, randomised study.	Dahan E, Ben Simon GJ, Lafuma A.	Eye (Lond)
22038532	Randomized clinical trial of a brief psychological intervention to increase walking in patients with intermittent claudication.	Cunningham MA, Swanson V, O'Carroll RE, Holdsworth RJ.	Br J Surg
23107470	Effects of comprehensive therapy based on traditional Chinese medicine patterns in stable chronic obstructive pulmonary disease: a four-center, open-label, randomized, controlled study.	Li SY, Li JS, Wang MH, -ie Y, Yu -Q, Sun ZK, Ma LJ, Zhang W, Zhang HL, Cao F, Pan YC.	BMC Complement Altern Med
22210087	Age-specific nonpersistence of endocrine therapy in postmenopausal patients diagnosed with hormone receptor-positive breast cancer: a TEAM study analysis.	van de Water W, Bastiaannet E, Hille ET, Meershoek-Klein Kranenbarg EM, Putter H, Seynaeve CM, Paridaens R, de Craen AJ, Westendorp RG, Liefers GJ, van de Velde CJ.	Oncologist
22369682	Randomised clinical trial: high-dose vs. standard-dose proton pump inhibitors for the prevention of recurrent haemorrhage after combined endoscopic haemostasis of bleeding peptic ulcers.	Chen CC, Lee JY, Fang YJ, Hsu SJ, Han ML, Tseng PH, Liou JM, Hu FC, Lin TL, Wu MS, Wang HP, Lin JT.	Aliment Pharmacol Ther
22872229	Effectiveness of the Austrian disease management programme Therapie Aktiv" for type 2 diabetes regarding the improvement of metabolic control risk profile and guideline adherence: 2 years of follow up."	Flamm M, Panisch S, Winkler H, Johansson T, Weitgasser R, Sonnichsen AC.	Wien Klin Wochenschr
21810842	Is there a BP benefit of changing the time of aspirin administration in treated hypertensive patients?	Dimitrov Y, Baguet JP, Hottelart C, Marboeuf P, Tartiere JM, Ducher M, Fauvel JP.	Eur J Prev Cardiol
21862415	A phase II study of eribulin mesylate (E7389) in patients with advanced, previously treated non-small-cell lung cancer.	Spira AI, Iannotti NO, Savin MA, Neubauer M, Gabrail NY, Yanagihara RH, Zang EA, Cole PE, Shuster D, Das A.	Clin Lung Cancer
21925716	Effect on perfusion chamber thrombus size in patients with atrial fibrillation during anticoagulant treatment with oral direct thrombin inhibitors, AZD0837 or -imelagatran, or with vitamin K antagonists.	Wolzt M, Eriksson UG, Gouya G, Leuchten N, Kapiotis S, Elg M, Schutzer KM, Zetterstrand S, Holmberg M, WÃ¥hlander K.	Thromb Res
22142823	Tumor infiltration by T lymphocytes e-pressing chemokine receptor 7 (CCR7) is predictive of favorable outcome in patients with advanced colorectal carcinoma.	Correale P, Rotundo MS, Botta C, Del Vecchio MT, Ginanneschi C, Licchetta A, Conca R, Apollinari S, De Luca F, Tassone P, Tagliaferri P.	Clin Cancer Res
22723310	A randomized, placebo-controlled study of the effects of denosumab for the treatment of men with low bone mineral density.	Orwoll E, TeglbjÃ¦rg CS, Langdahl BL, Chapurlat R, Czerwinski E, Kendler DL, Reginster JY, Kivitz A, Lewiecki EM, Miller PD, Bolognese MA, McClung MR, Bone HG, Ljunggren Ã?, Abrahamsen B, Gruntmanis U, Yang YC, Wagman RB, Siddhanti S, Grauer A, Hall JW, Boonen S.	J Clin Endocrinol Metab
23135976	Effect of bispectral inde- monitoring on e-tubation time and analgesic consumption in abdominal surgery: a randomised clinical trial.	Persec J, Persec Z, Kopljar M, Sojcic N, Husedzinovic I.	Swiss Med Wkly
22990062	Bipolar transurethral resection of the prostate causes deeper coagulation depth and less bleeding than monopolar transurethral prostatectomy.	Huang -, Wang L, Wang -H, Shi HB, Zhang -J, Yu ZY.	Urology
22081256	Clopidogrel tapering as a strategy to attenuate platelet rebound phenomenon in patients with bare-metal stents.	Yedidya I, Netzer A, Vaduganathan M, Solodky A, Kornowski R, Lev EI.	J Thromb Thrombolysis
21858589	A randomized controlled trial of conventional fraction and late course accelerated hyperfraction three-dimensional conformal radiotherapy for esophageal cancer.	Wang JH, Lu -J, Zhou J, Wang F.	Cell Biochem Biophys
22289903	Preoperative intraaortic balloon pump for off-pump coronary arterial revascularization.	Mannacio V, Di Tommaso L, De Amicis V, Stassano P, Musumeci F, Vosa C.	Ann Thorac Surg
22687235	Continuity in different care modes and its relationship to quality of life: a randomised controlled trial in patients with COPD.	Uijen AA, Bischoff EW, Schellevis FG, Bor HH, van den Bosch WJ, Schers HJ.	Br J Gen Pract
22459124	Minimally invasive total knee arthroplasty improves early knee strength but not functional performance: a randomized controlled trial.	Stevens-Lapsley JE, Bade MJ, Shulman BC, Kohrt WM, Dayton MR.	J Arthroplasty
22350110	Vitamin D reduces musculoskeletal pain after infusion of zoledronic acid for postmenopausal osteoporosis.	Catalano A, Morabito N, Atteritano M, Basile G, Cucinotta D, Lasco A.	Calcif Tissue Int
21890323	Oral preoperative antioxidants in pancreatic surgery: a double-blind, randomized, clinical trial.	Braga M, Bissolati M, Rocchetti S, Beneduce A, Pecorelli N, Di Carlo V.	Nutrition
22342408	Narrow band imaging cystoscopy and bipolar plasma vaporization for large nonmuscle-invasive bladder tumors--results of a prospective, randomized comparison to the standard approach.	Geavlete B, Multescu R, Georgescu D, Stanescu F, Jecu M, Geavlete P.	Urology
21573917	Survival benefit of bursectomy in patients with resectable gastric cancer: interim analysis results of a randomized controlled trial.	Fujita J, Kurokawa Y, Sugimoto T, Miyashiro I, Iijima S, Kimura Y, Takiguchi S, Fujiwara Y, Mori M, Doki Y.	Gastric Cancer
21659435	Patients with obstructive sleep apnea syndrome benefit from acetazolamide during an altitude sojourn: a randomized, placebo-controlled, double-blind trial.	Nussbaumer-Ochsner Y, Latshang TD, Ulrich S, Kohler M, Thurnheer R, Bloch KE.	Chest
21781149	Losartan and amlodipine on myocardial structure and function: a prospective, randomized, clinical trial.	Fogari R, Mugellini A, Destro M, Corradi L, Lazzari P, Zoppi A, Preti P, Derosa G.	Diabet Med
21925716	Effect on perfusion chamber thrombus size in patients with atrial fibrillation during anticoagulant treatment with oral direct thrombin inhibitors, AZD0837 or -imelagatran, or with vitamin K antagonists.	Wolzt M, Eriksson UG, Gouya G, Leuchten N, Kapiotis S, Elg M, Schutzer KM, Zetterstrand S, Holmberg M, WÃ¥hlander K.	Thromb Res
22080391	Influence of postoperative enteral nutrition on cellular immunity. A random double-blinded placebo controlled clinical trial.	Beier-Holgersen R, Brandstrup B.	Int J Colorectal Dis
22528280	Decompressive hemicraniectomy in malignant middle cerebral artery infarct: a randomized controlled trial enrolling patients up to 80 years old.	Zhao J, Su YY, Zhang Y, Zhang YZ, Zhao R, Wang L, Gao R, Chen W, Gao D.	Neurocrit Care
22930120	Association between alcohol screening scores and diabetic self-care behaviors.	Thomas RM, Francis Gerstel PA, Williams EC, Sun H, Bryson CL, Au DH, Bradley KA.	Fam Med
23127448	Use of Redon drains in primary total hip arthroplasty has no clinically relevant benefits.	von Roth P, Perka C, Dirschedl K, Mayr HO, Ensthaler L, Preininger B, Hube R.	Orthopedics
21647559	Ischemic preconditioning prior to intermittent Pringle maneuver in liver resections.	Winbladh A, Bjornsson B, Trulsson L, Offenbartl K, Gullstrand P, Sandstrom P.	J Hepatobiliary Pancreat Sci
22924638	Fractional flow reserve-guided PCI versus medical therapy in stable coronary disease.	De Bruyne B, Pijls NH, Kalesan B, Barbato E, Tonino PA, Piroth Z, Jagic N, Mobius-Winkler S, Rioufol G, Witt N, Kala P, MacCarthy P, Engstrom T, Oldroyd KG, Mavromatis K, Manoharan G, Verlee P, Frobert O, Curzen N, Johnson JB, Juni P, Fearon WF; et al.	N Engl J Med
22935584	O-aliplatin/capecitabine vs o-aliplatin/infusional 5-FU in advanced colorectal cancer: the MRC COIN trial.	Madi A, Fisher D, Wilson RH, Adams RA, Meade AM, Kenny SL, Nichols LL, Seymour MT, Wasan H, Kaplan R, Maughan TS; COIN trial research group.	Br J Cancer
22099051	Effect of recombinant human endostatin on radiosensitivity in patients with non-small-cell lung cancer.	Jiang -D, Dai P, Wu J, Song DA, Yu JM.	Int J Radiat Oncol Biol Phys
22240782	Triplets versus doublets, with or without cisplatin, in the first-line treatment of stage IIIB-IV non-small cell lung cancer (NSCLC) patients: a multicenter randomised factorial trial (FAST).	Boni C, Tiseo M, Boni L, Baldini E, Recchia F, Barone C, Grossi F, Germano D, Matano E, Marini G, Labianca R, Di Costanzo F, Bagnulo A, Pennucci C, Caroti C, Mencoboni M, Zanelli F, Prochilo T, Cafferata MA, Ardizzoni A; Gruppo Oncologico Italiano di Ricerca Clinica (GOIRC).	Br J Cancer
22458918	Fixed-combination brimonidine-timolol versus latanoprost in glaucoma and ocular hypertension: a 12-week, randomized, comparison study.	Katz LJ, Rauchman SH, Cottingham AJ Jr, Simmons ST, Williams JM, Schiffman RM, Hollander DA.	Curr Med Res Opin
22493375	Intra-arterial infusion of irinotecan-loaded drug-eluting beads (DEBIRI) versus intravenous therapy (FOLFIRI) for hepatic metastases from colorectal cancer: final results of a phase III study.	Fiorentini G, Aliberti C, Tilli M, Mulazzani L, Graziano F, Giordani P, Mambrini A, Montagnani F, Alessandroni P, Catalano V, Coschiera P.	Anticancer Res
22652582	Long-term comparative immunogenicity of protein conjugate and free polysaccharide pneumococcal vaccines in chronic obstructive pulmonary disease.	Dransfield MT, Harnden S, Burton RL, Albert RK, Bailey WC, Casaburi R, Connett J, Cooper JA, Criner GJ, Curtis JL, Han MK, Make B, Marchetti N, Martinez FJ, McEvoy C, Nahm MH, Niewoehner DE, Porszasz J, Reilly J, Scanlon PD, Scharf SM, Sciurba FC, et al.	Clin Infect Dis
22686416	Basal insulin and cardiovascular and other outcomes in dysglycemia.	ORIGIN Trial Investigators, Gerstein HC, Bosch J, Dagenais GR, DÃ­az R, Jung H, Maggioni AP, Pogue J, Probstfield J, Ramachandran A, Riddle MC, Ryden LE, Yusuf S.	N Engl J Med
22162175	Effect of bivalirudin compared with unfractionated heparin plus abci-imab on infarct size and myocardial recovery after primary percutaneous coronary intervention: the horizons-AMI CMRI substudy.	Wohrle J, Merkle N, Kunze M, Cristea E, Mehran R, Rottbauer W, Stone GW.	Catheter Cardiovasc Interv
22210721	Comparative analysis between nasolabial and island pedicle flaps in the ala nose reconstruction. Prospective study.	Monarca C, Rizzo MI, Palmieri A, Chiummariello S, Fino P, Scuderi N.	In Vivo
22222634	Perampanel in Parkinson disease fluctuations: a double-blind randomized trial with placebo and entacapone.	Rascol O, Barone P, Behari M, Emre M, Giladi N, Olanow CW, Ruzicka E, Bibbiani F, Squillacote D, Patten A, Tolosa E.	Clin Neuropharmacol
22366535	Effects of subthalamic nucleus deep brain stimulation and L-DOPA on blinking in Parkinson's disease.	Bologna M, Fasano A, Modugno N, Fabbrini G, Berardelli A.	E-p Neurol
22433193	Procedural and early clinical outcomes of patients with de novo coronary bifurcation lesions treated with the novel Nile PAX dedicated bifurcation polymer free paclitaxel coated stents: results from the prospective, multicentre, non-randomised BIPAX clinical trial.	Costa RA, Abizaid A, Abizaid AS, Garcia del Blanco B, Berland J, Petrov I, Brenot P, van Guens RJ, Royer T, Rubino P, Lesiak M, Fajadet J; BIPA- Investigators.	EuroIntervention
21833852	Comparison of ultrasonography and physical e-amination in the diagnosis of incisional hernia in a prospective study.	Bloemen A, van Dooren P, Huizinga BF, Hoofwijk AG.	Hernia
22800889	Three hours continuous injection of adenosine improved left ventricular function and infarct size in patients with ST-segment elevation myocardial infarction.	Zhang H, Tian NL, Hu ZY, Wang F, Chen L, Zhang YJ, Chen SL.	Chin Med J (Engl)
22858078	Heart failure outcomes and benefits of NT-proBNP-guided management in the elderly: results from the prospective, randomized ProBNP outpatient tailored chronic heart failure therapy (PROTECT) study.	Gaggin HK, Mohammed AA, Bhardwaj A, Rehman SU, Gregory SA, Weiner RB, Baggish AL, Moore SA, Semigran MJ, Januzzi JL Jr.	J Card Fail
22217551	Clinical evaluation of an autofluorescence diagnostic device for oral cancer detection: a prospective randomized diagnostic study.	Rana M, Zapf A, Kuehle M, Gellrich NC, Eckardt AM.	Eur J Cancer Prev
22231607	Statin use and risk of diabetes mellitus in postmenopausal women in the Women's Health Initiative.	Culver AL, Ockene IS, Balasubramanian R, Olendzki BC, Sepavich DM, Wactawski-Wende J, Manson JE, Qiao Y, Liu S, Merriam PA, Rahilly-Tierny C, Thomas F, Berger JS, Ockene JK, Curb JD, Ma Y.	Arch Intern Med
22326237	Long-term safety and tolerability of rotigotine transdermal system in patients with early-stage idiopathic Parkinson's disease: a prospective, open-label e-tension study.	Elmer LW, Surmann E, Boroojerdi B, Jankovic J.	Parkinsonism Relat Disord
22424015	Five-year follow-up of the Sirolimus-Eluting Stents vs Vascular Brachytherapy for Bare Metal In-Stent Restenosis (SISR) trial.	Alli OO, Teirstein PS, Satler L, Sketch MH Jr, Popma JJ, Mauri L, Wang HP, Schleckser PA, Cohen SA, Holmes DR Jr; SISR Investigators.	Am Heart J
22972968	Health-related quality-of-life findings for the prostate cancer prevention trial.	Moinpour CM, Darke AK, Donaldson GW, Cespedes D, Johnson CR, Ganz PA, Patrick DL, Ware JE Jr, Shumaker SA, Meyskens FL, Thompson IM Jr.	J Natl Cancer Inst
21626051	A drug interaction study evaluating the pharmacokinetics and to-icity of sorafenib in combination with capecitabine.	Infante JR, Jones SF, Bendell JC, Greco FA, Yardley DA, Lane CM, Spigel DR, Hainsworth JD, Burris HA 3rd.	Cancer Chemother Pharmacol
21737235	Efficacy and cardiovascular tolerability of continuous veno-venous hemodiafiltration in acute decompensated heart failure: a randomized comparative study.	Badawy SS, Fahmy A.	J Crit Care
22081052	Rikkunshito improves symptoms in PPI-refractory GERD patients: a prospective, randomized, multicenter trial in Japan.	Tominaga K, Iwakiri R, Fujimoto K, Fujiwara Y, Tanaka M, Shimoyama Y, Umegaki E, Higuchi K, Kusano M, Arakawa T; GERD 4 Study Group.	J Gastroenterol
22119204	A phase III trial of doceta-el-estramustine in high-risk localised prostate cancer: a planned analysis of response, to-icity and quality of life in the GETUG 12 trial.	Fizazi K, Lesaunier F, Delva R, Gravis G, Rolland F, Priou F, Ferrero JM, Houede N, Mourey L, Theodore C, Krakowski I, Berdah JF, Baciuchka M, Laguerre B, Flechon A, Ravaud A, Cojean-Zelek I, Oudard S, Labourey JL, Lagrange JL, Chinet-Charrot P, Linassier C, et al.	Eur J Cancer
22234519	Health-related quality of life, psychological distress, and adverse events in postmenopausal women with breast cancer who receive tamo-ifen, e-emestane, or anastrozole as adjuvant endocrine therapy: National Surgical Adjuvant Study of Breast Cancer 04 (N-SAS BC 04).	Takei H, Ohsumi S, Shimozuma K, Takehara M, Suemasu K, Ohashi Y, Hozumi Y.	Breast Cancer Res Treat
22289235	Full kinetic chain manual and manipulative therapy plus e-ercise compared with targeted manual and manipulative therapy plus e-ercise for symptomatic osteoarthritis of the hip: a randomized controlled trial.	Brantingham JW, Parkin-Smith G, Cassa TK, Globe GA, Globe D, Pollard H, deLuca K, Jensen M, Mayer S, Korporaal C.	Arch Phys Med Rehabil
22565936	Pacemaker therapy in patients with neurally mediated syncope and documented asystole: Third International Study on Syncope of Uncertain Etiology (ISSUE-3): a randomized trial.	Brignole M, Menozzi C, Moya A, Andresen D, Blanc JJ, Krahn AD, Wieling W, Beiras -, Deharo JC, Russo V, Tomaino M, Sutton R; International Study on Syncope of Uncertain Etiology 3 (ISSUE-3) Investigators.	Circulation
22622405	Safety and pharmacokinetics of an anti-PcrV PEGylated monoclonal antibody fragment in mechanically ventilated patients colonized with Pseudomonas aeruginosa: a randomized,double-blind, placebo-controlled trial.	Francois B, Luyt CE, Dugard A, Wolff M, Diehl JL, Jaber S, Forel JM, Garot D, Kipnis E, Mebazaa A, Misset B, Andremont A, Ploy MC, Jacobs A, Yarranton G, Pearce T, Fagon JY, Chastre J.	Crit Care Med
22660367	The usefulness of bladder reconditioning before indwelling urethral catheter removal from stroke patients.	Moon HJ, Chun MH, Lee SJ, Kim BR.	Am J Phys Med Rehabil
22968626	Phase III randomized trial of toremifene versus tamo-ifen for Japanese postmenopausal patients with early breast cancer.	Kimura M, Tominaga T, Kimijima I, Takatsuka Y, Takashima S, Nomura Y, Kasumi F, Yamaguchi A, Masuda N, Noguchi S, Eshima N.	Breast Cancer
22995879	Outcomes of patients with prior coronary artery bypass grafting and acute coronary syndromes: analysis from the ACUITY (Acute Catheterization and Urgent Intervention Triage Strategy) trial.	Nikolsky E, McLaurin BT, Co- DA, Manoukian SV, -u K, Mehran R, Stone GW.	JACC Cardiovasc Interv
23022248	Perioperative supplementation with ascorbic acid does not prevent atrial fibrillation in coronary artery bypass graft patients.	Bjordahl PM, Helmer SD, Gosnell DJ, Wemmer GE, O'Hara WW, Milfeld DJ.	Am J Surg
23075127	Hydro-yethyl starch or saline for fluid resuscitation in intensive care.	Myburgh JA, Finfer S, Bellomo R, Billot L, Cass A, Gattas D, Glass P, Lipman J, Liu B, McArthur C, McGuinness S, Rajbhandari D, Taylor CB, Webb SA; CHEST Investigators; Australian and New Zealand Intensive Care Society Clinical Trials Group.	N Engl J Med
23111148	Medical-grade honey does not reduce skin colonization at central venous catheter-insertion sites of critically ill patients: a randomized controlled trial.	Kwakman PH, Muller MC, Binnekade JM, van den Akker JP, de Borgie CA, Schultz MJ, Zaat SA.	Crit Care
22548691	Effectiveness of Dader Method for pharmaceutical care on control of blood pressure and total cholesterol in outpatients with cardiovascular disease or cardiovascular risk: EMDADER-CV randomized controlled trial.	Amariles P, Sabater-HernÃ¡ndez D, GarcÃ­a-Jimenez E, RodrÃ­guez-Chamorro MÃ, Prats-MÃ¡s R, MarÃ­n-MagÃ¡n F, GalÃ¡n-Ceballos JA, Jimenez-MartÃ­n J, Faus MJ.	J Manag Care Pharm
22716974	A midurethral sling to reduce incontinence after vaginal prolapse repair.	Wei JT, Nygaard I, Richter HE, Nager CW, Barber MD, Kenton K, Amundsen CL, Schaffer J, Meikle SF, Spino C; Pelvic Floor Disorders Network.	N Engl J Med
22421420	Cerebral o-ygen saturation measured by near-infrared spectroscopy and jugular venous bulb o-ygen saturation during arthroscopic shoulder surgery in beach chair position under sevoflurane-nitrous o-ide or propofol-remifentanil anesthesia.	Jeong H, Jeong S, Lim HJ, Lee J, Yoo KY.	Anesthesiology
22931971	Hemodynamic changes of fractional flow reserve after double kissing crush and provisional stenting technique for true bifurcation lesions.	Ye F, Chen SL, Zhang JJ, Zhu ZS, Kan J, Tian NL, Lin S, Liu ZZ, You W, -u HM, -u J.	Chin Med J (Engl)
22350244	Laparoscopic common bile duct e-ploration versus open surgery: comparative prospective randomized trial.	Grubnik VV, Tkachenko AI, Ilyashenko VV, Vorotyntseva KO.	Surg Endosc
22371836	Prosthetic aspects and patient satisfaction with resilient liner and clip attachments for bar- and implant-retained mandibular overdentures: a 3-year randomized clinical study.	ELsyad MA.	Int J Prosthodont
22534814	Randomized phase 2b study of pralatre-ate versus erlotinib in patients with stage IIIB/IV non-small-cell lung cancer (NSCLC) after failure of prior platinum-based therapy.	Kelly K, Azzoli CG, Zatloukal P, Albert I, Jiang PY, Bodkin D, Pereira JR, JuhÃ¡sz E, Iannotti NO, Weems G, Koutsoukos T, Patel JD.	J Thorac Oncol
22854954	Preliminary e-perience of fast-track surgery combined with laparoscopy-assisted radical distal gastrectomy for gastric cancer.	Chen Hu J, -in Jiang L, Cai L, Tao Zheng H, Yuan Hu S, Bing Chen H, Chang Wu G, Fei Zhang Y, Chuan Lv Z.	J Gastrointest Surg
22156314	Randomized study on the efficacy and safety of landiolol, an ultra-short-acting Î²1-adrenergic blocker, in patients with acute myocardial infarction undergoing primary percutaneous coronary intervention.	Hanada K, Higuma T, Nishizaki F, Sukekawa T, Yokota T, Yamada M, Saito S, Kushibiki M, Oikawa K, Abe N, Tomita H, Osanai T, Okumura K.	Circ J
22260307	Anterior suspension combined with posterior reconstruction during robot-assisted laparoscopic prostatectomy improves early return of urinary continence: a prospective randomized multicentre trial.	Hurtes -, RouprÃªt M, Vaessen C, Pereira H, Faivre d'Arcier B, Cormier L, BruyÃ¨re F.	BJU Int
22545252	Microwave denture disinfection versus nystatin in treating patients with well-controlled type 2 diabetes and denture stomatitis: a randomized clinical trial.	Sanita PV, Machado AL, Pavarina AC, Massucato EM, Colombo AL, Vergani CE.	Int J Prosthodont
22607867	Long-term clinical and angiographic outcomes of diabetic patients after revascularization with early generation drug-eluting stents.	Billinger M, RÃ¤ber L, Hitz S, Stefanini GG, Pilgrim T, Stettler C, Zanchin T, Pulver C, PfÃ¤ffli N, Eberli F, Meier B, Kalesan B, Juni P, Windecker S.	Am Heart J
21684040	Non-invasive brain stimulation improves object-location learning in the elderly.	Floel A, Suttorp W, Kohl O, Kurten J, Lohmann H, Breitenstein C, Knecht S.	Neurobiol Aging
21782171	Informed consent in trauma: does written information improve patient recall of risks? A prospective randomised study.	Smith HK, Manjaly JG, Yousri T, Upadhyay N, Taylor H, Nicol SG, Livingstone JA.	Injury
21823994	Responses to superficial heating and cooling differ in men and women with knee osteoarthritis.	Denegar CR, Schimizzi ME, Dougherty DR, Friedman JE, Clark JE, Comstock BA, Kraemer WJ.	Physiother Theory Pract
21928106	Astragalus polysaccharide injection integrated with vinorelbine and cisplatin for patients with advanced non-small cell lung cancer: effects on quality of life and survival.	Guo L, Bai SP, Zhao L, Wang -H.	Med Oncol
22120130	Long-term omega-3 polyunsaturated fatty acid supplementation reduces the recurrence of persistent atrial fibrillation after electrical cardioversion.	Kumar S, Sutherland F, Morton JB, Lee G, Morgan J, Wong J, Eccleston DE, Voukelatos J, Garg ML, Sparks PB.	Heart Rhythm
22189652	Core temperatures during major abdominal surgery in patients warmed with new circulating-water garment, forced-air warming, or carbon-fiber resistive-heating system.	Hasegawa K, Negishi C, Nakagawa F, Ozaki M.	J Anesth
22676245	Randomized phase II study of three doses of oral TAS-108 in postmenopausal patients with metastatic breast cancer.	Inaji H, Iwata H, Nakayama T, Yamamoto N, Sato Y, Tokuda Y, Aogi K, Saji S, Watanabe K, Saito T, Yoshida M, Sato N, Saeki T, Takatsuka Y, Kuranami M, Yamashita H, Kikuchi A, Tabei T, Ikeda T, Noguchi S.	Cancer Sci
22791766	Six months of parathyroid Hormone (1-84) administered concurrently versus sequentially with monthly ibandronate over two years: the PTH and ibandronate combination study (PICS) randomized trial.	Schafer AL, Sellmeyer DE, Palermo L, Hietpas J, Eastell R, Shoback DM, Black DM.	J Clin Endocrinol Metab
23103036	Effects of radial versus femoral artery access in patients with acute coronary syndromes with or without ST-segment elevation.	Mehta SR, Jolly SS, Cairns J, Niemela K, Rao SV, Cheema AN, Steg PG, Cantor WJ, DÅ¾avÃ­k V, Budaj A, Rokoss M, Valentin V, Gao P, Yusuf S; RIVAL Investigators.	J Am Coll Cardiol
23238504	Does preoperative radiotherapy with postoperative chemotherapy increase acute side-effects and postoperative complications of total mesorectal e-cision? Report of the randomized finnish rectal cancer trial.	SalmenkylÃ¤ S, Kouri M, Osterlund P, Pukkala E, Luukkonen P, Hyoty M, PÃ¤Ã¤kkonen M, MÃ¤kelÃ¤ J, Mustonen H, JÃ¤rvinen HJ.	Scand J Surg
22377796	Two-year randomized, placebo-controlled study of black currant anthocyanins on visual field in glaucoma.	Ohguro H, Ohguro I, Katai M, Tanaka S.	Ophthalmologica
22722637	Five-year follow-up study of a kidney-tonifying herbal Fufang for prevention of postmenopausal osteoporosis and fragility fractures.	Deng WM, Zhang P, Huang H, Shen YG, Yang QH, Cui WL, He YS, Wei S, Ye Z, Liu F, Qin L.	J Bone Miner Metab
22077192	Rivaro-aban in patients with a recent acute coronary syndrome.	Mega JL, Braunwald E, Wiviott SD, Bassand JP, Bhatt DL, Bode C, Burton P, Cohen M, Cook-Bruns N, Fo- KA, Goto S, Murphy SA, Plotnikov AN, Schneider D, Sun -, Verheugt FW, Gibson CM; ATLAS ACS 2â??TIMI 51 Investigators.	N Engl J Med
22169831	Efficacy of low level laser therapy associated with e-ercises in knee osteoarthritis: a randomized double-blind study.	Alfredo PP, Bjordal JM, Dreyer SH, Meneses SR, Zaguetti G, Ovanessian V, Fukuda TY, Junior WS, Lopes Martins RÃ, Casarotto RA, Marques AP.	Clin Rehabil
22633601	A low-fat dietary pattern and risk of metabolic syndrome in postmenopausal women: the Women's Health Initiative.	Neuhouser ML, Howard B, Lu J, Tinker LF, Van Horn L, Caan B, Rohan T, Stefanick ML, Thomson CA.	Metabolism
21625252	Cytidine deaminase single-nucleotide polymorphism is predictive of to-icity from gemcitabine in patients with pancreatic cancer: RTOG 9704.	Farrell JJ, Bae K, Wong J, Guha C, Dicker AP, Elsaleh H.	Pharmacogenomics J
23166425	Inhalation therapy of calcitonin relieves osteoarthritis of the knee.	Armagan O, Serin DK, Calisir C, Dokumacioglu A, Ozgen M, Oner S, Alatas O.	J Korean Med Sci
21590327	Comparative trial of two intravenous doses of granisetron (1 versus 3 mg) in the prevention of chemotherapy-induced acute emesis: a double-blind, randomized, non-inferiority trial.	Tsuji D, Kim YI, Taku K, Nakagaki S, Ikematsu Y, Tsubota H, Maeda M, Hashimoto N, Kimura M, Daimon T.	Support Care Cancer
22088820	NBCA medical adhesive (n-butyl-2-cyanoacrylate) versus suture for patch fi-ation in Lichtenstein inguinal herniorrhaphy: a randomized controlled trial.	Shen YM, Sun WB, Chen J, Liu SJ, Wang MG.	Surgery
22170083	Randomized clinical trial on preoperative radiotherapy 25 Gy in rectal cancer--treatment results at 5-year follow-up.	Pach R, Kulig J, Richter P, Gach T, Szura M, Kowalska T.	Langenbecks Arch Surg
22209175	Impact of patients' positions on the incidence of arrhythmias during pulmonary artery catheterization.	Pipanmekaporn T, Bunchungmongkol N, Pin on P, Punjasawadwong Y.	J Cardiothorac Vasc Anesth
23212859	Effect of timing of dialysis commencement on clinical outcomes of patients with planned initiation of peritoneal dialysis in the IDEAL trial.	Johnson DW, Wong MG, Cooper BA, Branley P, Bulfone L, Collins JF, Craig JC, Fraenkel MB, Harris A, Kesselhut J, Li JJ, Lu-ton G, Pilmore A, Tiller DJ, Harris DC, Pollock CA.	Perit Dial Int
22462626	Increasing the dose of vardenafil on a daily basis does not improve erectile function after unilateral nerve-sparing radical prostatectomy.	Bannowsky A, van Ahlen H, Loch T.	J Se- Med
21801476	Effect of B-vitamins and n-3 PUFA supplementation for 5 years on blood pressure in patients with CVD.	Szabo de Edelenyi F, Vergnaud AC, Ahluwalia N, Julia C, Hercberg S, Blacher J, Galan P.	Br J Nutr
22180255	Who may have durable benefit from robotic gait training?: a 2-year follow-up randomized controlled trial in patients with subacute stroke.	Morone G, Iosa M, Bragoni M, De Angelis D, Venturiero V, Coiro P, Riso R, Pratesi L, Paolucci S.	Stroke
22228638	Randomized phase II trial of sorafenib with temsirolimus or tipifarnib in untreated metastatic melanoma (S0438).	Margolin KA, Moon J, Flaherty LE, Lao CD, Akerley WL 3rd, Othus M, Sosman JA, Kirkwood JM, Sondak VK.	Clin Cancer Res
22190336	An extended theory of planned behavior intervention for older adults with type 2 diabetes and cardiovascular disease.	White KM, Terry DJ, Troup C, Rempel LA, Norman P, Mummery K, Riley M, Posner N, Kenardy J.	J Aging Phys Act
22902097	Patients' perceptions of subcutaneous delivery of darbepoetin alfa by autoinjector prefilled pen versus prefilled syringe: a randomized, crossover study.	Lim WH, Chan D, Boudville N, Pellicano S, Herson H, Moody H, Hutchison B, Snedeker M, Dogra G.	Clin Ther
22386009	The impact on self-efficacy of different types of follow-up care and disease status in patients with rheumatoid arthritis--a randomized trial.	Primdahl J, Wagner L, Holst R, HÃ¸rslev-Petersen K; AMBRA Study Group.	Patient Educ Couns
22461535	Effects of sevelamer on HbA1c, inflammation, and advanced glycation end products in diabetic kidney disease.	Vlassara H, Uribarri J, Cai W, Goodman S, Pyzik R, Post J, Grosjean F, Woodward M, Striker GE.	Clin J Am Soc Nephrol
23110471	Olmesarta-mlodipine/hydrochlorothiazide in participants with hypertension and diabetes, chronic kidney disease, or chronic cardiovascular disease: a subanalysis of the multicenter, randomized, double-blind, parallel-group TRINITY study.	Kereiakes DJ, Chrysant SG, Izzo JL Jr, Littlejohn T 3rd, Melino M, Lee J, Fernandez V, Heyrman R.	Cardiovasc Diabetol
21997547	Higher adenoma detection rates with cap-assisted colonoscopy: a randomised controlled trial.	Rastogi A, Bansal A, Rao DS, Gupta N, Wani SB, Shipe T, Gaddam S, Singh V, Sharma P.	Gut
22392934	The effect of neoadjuvant chemoradiotherapy on airway colonization and postoperative respiratory complications in patients undergoing oesophagectomy for oesophageal cancer.	Bagheri R, RajabiMashhadi MT, Ghazvini K, Asnaashari A, Zahediyan A, Sahebi MA.	Interact Cardiovasc Thorac Surg
22498923	Real-time moment-to-moment emotional responses to narrative and informational breast cancer videos in African American women.	Bollinger S, Kreuter MW.	Health Educ Res
22575311	Intraprocedural thrombotic events during percutaneous coronary intervention in patients with non-ST-segment elevation acute coronary syndromes are associated with adverse outcomes: analysis from the ACUITY (Acute Catheterization and Urgent Intervention Triage Strategy) trial.	McEntegart MB, Kirtane AJ, Cristea E, Brener S, Mehran R, Fahy M, Moses JW, Stone GW.	J Am Coll Cardiol
22893135	Hyoscine butylbromide administered at the cecum increases polyp detection: a randomized double-blind placebo-controlled trial.	Corte C, Dahlenburg L, Selby W, Griffin S, Byrne C, Chua T, Kaffes A.	Endoscopy
22961272	Local administration of growth hormone stimulates tendon collagen synthesis in elderly men.	Vestergaard P, JÃ¸rgensen JO, Olesen JL, Bosnjak E, Holm L, Frystyk J, Langberg H, Kjaer M, Hansen M.	J Appl Physiol
21791146	DNA methylation and cognitive functioning in healthy older adults.	Schiepers OJ, van Bo-tel MP, de Groot RH, Jolles J, Kok FJ, Verhoef P, Durga J.	Br J Nutr
22228772	Gender-based divergence of cardiovascular outcomes in asymptomatic patients with type 2 diabetes: results from the DIAD study.	Tandon S, Wackers FJ, Inzucchi SE, Bansal S, Staib LH, Chyun DA, Davey JA, Young LH; DIAD Investigators.	Diab Vasc Dis Res
22622147	A randomized, phase II trial of standard triweekly compared with dose-dense biweekly capecitabine plus o-aliplatin plus bevacizumab as first-line treatment for metastatic colorectal cancer: -ELO--A-DVS (dense versus standard).	Hurwitz H, Mitchell EP, Cartwright T, Kwok A, Hu S, McKenna E, Patt YZ.	Oncologist
21523893	Sustained clinical safety and efficacy of a biodegradable-polymer coated sirolimus-eluting stent in real-world" practice: three-year outcomes of the CREATE (Multi-Center Registry of E-CEL Biodegradable Polymer Drug Eluting Stents) study."	Han Y, Jing Q, Li Y, Yang L, Liu H, Shang -, Jiang T, Li Z, Zhang H, Yan G; Multi-Center Registry of E-CEL BiodegrAdable Polymer Drug EluTing Stents (CREATE) investigators.	Catheter Cardiovasc Interv
21345681	Mobile bearing UKA compared to fi-ed bearing TKA: a randomized prospective study.	Sun PF, Jia YH.	Knee
22149065	Effects of vitamin D3 and calcium supplementation on serum levels of tocopherols, retinol, and specific vitamin D metabolites.	Chai W, Bostick RM, Ahearn TU, Franke AA, Custer LJ, Cooney RV.	Nutr Cancer
22226132	Hemolysis of coagulation specimens: a comparative study of intravenous draw methods.	Stauss M, Sherman B, Pugh L, Parone D, Looby-Rodriguez K, Bell A, Reed CR.	J Emerg Nurs
22243774	A randomized phase II trial of S-1-o-aliplatin versus capecitabine-o-aliplatin in advanced gastric cancer.	Kim GM, Jeung HC, Rha SY, Kim HS, Jung I, Nam BH, Lee KH, Chung HC.	Eur J Cancer
22508814	Accelerated radiotherapy with carbogen and nicotinamide for laryngeal cancer: results of a phase III randomized trial.	Janssens GO, Rademakers SE, Terhaard CH, Doornaert PA, Bijl HP, van den Ende P, Chin A, Marres HA, de Bree R, van der Kogel AJ, Hoogsteen IJ, Bussink J, Span PN, Kaanders JH.	J Clin Oncol
22747998	Improving treatment intensification to reduce cardiovascular disease risk: a cluster randomized trial.	Selby JV, Schmittdiel JA, Fireman B, Jaffe M, Ransom LJ, Dyer W, Uratsu CS, Reed ME, Kerr EA, Hsu J.	BMC Health Serv Res
22973092	Once-daily NVA237 improves e-ercise tolerance from the first dose in patients with COPD: the GLOW3 trial.	Beeh KM, Singh D, Di Scala L, Drollmann A.	Int J Chron Obstruct Pulmon Dis
21567655	A randomized controlled trial of mindfulness-based cognitive therapy for treating tinnitus.	Philippot P, Nef F, Clauw L, de Romree M, Segal Z.	Clin Psychol Psychother
22059933	A preliminary randomized controlled study to determine the application frequency of a new lymphoedema bandaging system.	Moffatt CJ, Franks PJ, Hardy D, Lewis M, Parker V, Feldman JL.	Br J Dermatol
22447888	Intracoronary abci-imab and aspiration thrombectomy in patients with large anterior myocardial infarction: the INFUSE-AMI randomized trial.	Stone GW, Maehara A, Witzenbichler B, Godlewski J, Parise H, Dambrink JH, Ochala A, Carlton TW, Cristea E, Wolff SD, Brener SJ, Chowdhary S, El-Omar M, Neunteufl T, Metzger DC, Karwoski T, Dizon JM, Mehran R, Gibson CM; INFUSE-AMI Investigators.	JAMA
21937705	A multicenter randomized phase III trial of vinorelbine/gemcitabine doublet versus capecitabine monotherapy in anthracycline- and ta-ane-pretreated women with metastatic breast cancer.	Pallis AG, Boukovinas I, Ardavanis A, Varthalitis I, Malamos N, Georgoulias V, Mavroudis D.	Ann Oncol
22020318	A randomized phase II study of two doses of vorinostat in combination with 5-FU/LV in patients with refractory colorectal cancer.	Fakih MG, Groman A, McMahon J, Wilding G, Muindi JR.	Cancer Chemother Pharmacol
22252927	Phase 2 results from Radiation Therapy Oncology Group Study 0537: a phase 2/3 study comparing acupuncture-like transcutaneous electrical nerve stimulation versus pilocarpine in treating early radiation-induced -erostomia.	Wong RK, James JL, Sagar S, Wyatt G, Nguyen-TÃ¢n PF, Singh AK, Lukaszczyk B, Cardinale F, Yeh AM, Berk L.	Cancer
22293719	Continuous femoral nerve blocks: decreasing local anesthetic concentration to minimize quadriceps femoris weakness.	Bauer M, Wang L, Onibonoje OK, Parrett C, Sessler DI, Mounir-Soliman L, Zaky S, Krebs V, Buller LT, Donohue MC, Stevens-Lapsley JE, Ilfeld BM.	Anesthesiology
22421983	Metabolic effects of short-term GLP-1 treatment in insulin resistant heart failure patients.	Nielsen R, Wiggers H, Halbirk M, BÃ¸tker H, Holst JJ, Schmitz O, Frandsen E, Nielsen S, MÃ¸ller N, NÃ¸rrelund H.	E-p Clin Endocrinol Diabetes
22525048	Tofacitinib (CP-690,550), a Janus kinase inhibitor for dry eye disease: results from a phase 1/2 trial.	Liew SH, Nichols KK, Klamerus KJ, Li JZ, Zhang M, Foulks GN.	Ophthalmology
22578914	Intravenous immunoglobulin versus intravenous methylprednisolone for chronic inflammatory demyelinating polyradiculoneuropathy: a randomised controlled trial.	Nobile-Orazio E, Cocito D, Jann S, Uncini A, Beghi E, Messina P, Antonini G, Fazio R, Gallia F, Schenone A, Francia A, Pareyson D, Santoro L, Tamburin S, Macchia R, Cavaletti G, Giannini F, Sabatelli M; IMC Trial Group.	Lancet Neurol
22595446	Efficacy of metal and plastic stents in unresectable comple- hilar cholangiocarcinoma: a randomized controlled trial.	Sangchan A, Kongkasame W, Pugkhem A, Jenwitheesuk K, Mairiang P.	Gastrointest Endosc
22646630	Preoperative chemoradiotherapy for esophageal or junctional cancer.	van Hagen P, Hulshof MC, van Lanschot JJ, Steyerberg EW, van Berge Henegouwen MI, Wijnhoven BP, Richel DJ, Nieuwenhuijzen GA, Hospers GA, Bonenkamp JJ, Cuesta MA, Blaisse RJ, Busch OR, ten Kate FJ, Creemers GJ, Punt CJ, Plukker JT, Verheul HM, Spillenaar Bilgen EJ, van Dekken H, van der Sangen MJ, Rozema T, et al.	N Engl J Med
22727475	Atrioventricular delay programming in cardiac resynchronization therapy devices: fi-ed or adaptive? A randomized monocenter trial.	Schueler M, Voss F, Bauer A, Thomas D, Kelemen K, Katus HA, Becker R.	J Electrocardiol
22790008	Is there any benefit to adding intravenous ketamine to patient-controlled epidural analgesia after thoracic surgery? A randomized double-blind study.	Joseph C, Gaillat F, Duponq R, Lieven R, Baumstarck K, Thomas P, Penot-Ragon C, Kerbaul F.	Eur J Cardiothorac Surg
